# Supplementary material for: Identification of microRNA Genes in Three Opisthorchiids
Source: PubMed Central journal article supplement (PMC4405270; doi:10.1371/journal.pntd.0003680), 2015-04-21
Supplement: pntd.0003680.s001.pdf [file pntd.0003680.s001.pdf]

**S1 Appendix.** Alignment of miRNA clusters.

csi – *C. sinensis*, egr – *E. granulosus*, emu – *E. multilocularis*, gsa – *G. salaris*, hmi – *H. microstoma*, sja – *S. japonicum*, sma – *S. mansoni*, sme – *S. mediterranea*, tso – *T. solium*, sec. struc. – secondary structure. Mature miRNA sequences are in bold type and underlined. Clusters of *S. mediterranea* were obtained from contigs:

297 (gi|124128508|gb|AAWT01093310.1) (- strand)

1403 (gi|124163860|gb|AA WT01057958.1) (+ strand) (locus 1)

5146 (gi|124196975|gb|AA WT01024843.1) (+ strand) (locus 2)

2151 (gi|124194162|gb|AA WT01027656.1) (+ strand)

Cluster of *C. sinensis* was obtained from contig 2339 (gi|353340623|dbj|BADR02002339.1) (- strand)

Cluster of *S. mansoni* was obtained from chromosome W (gi|360043576|emb|HE601631.1) (+ strand)

Cluster of *S. japonicum* was obtained from contig S000054 (gi|227129020|emb|FN331028.1) (- strand)

Cluster of *H. microstoma* was obtained from contig 370001 (gi|528309775|emb|CBLW010002354.1) (+ strand)

Cluster of *E. granulosus* was obtained from contig 0003137 (gi|528307253|emb|CBLN010000400.1) (- strand)

Cluster of *E. multilocularis* was obtained from contig 007728 (gi|528775369|emb|CBLO010002090.1) (- strand)

Cluster of *T. solium* was obtained from contig 01703 (pathogen\_TSM\_contig\_01703) (+ strand)

Cluster of *G. salaris* was obtained from scaffold 7180006951238\_1\_32618\_C\_75.085\_gc\_34.438 (+ strand)

miRNA name  
sec. struc.

```
sme_miR-71c/2c -----TAATATGTTTGT--TTAAGCT-TAGTAATTATTTCA-TTTC AAGGTAAA--T-TGTCATTTCTTTG-CCAAGAAATCACATGTT 75  
sme_miR-71a-1/2a-1_l1 -----TAAAAATTATTGA--AAGCGCCATGTTGGTCATTTCT-TTGCCGTGAAAAA--TATATGAATCATATAAATTTGAAT-GTGAATT 77  
sme_miR-71a-1/2a-1_l2 -----TAAAAATTATTGA--AAGCGCCATGTTGGTCATTTCT-TTGCCGTGAAAAA--TATATGAATCATATAAATTTGAAT-GTGAATT 77  
sme_miR-71a2/2a2 ACATTTTATAAATGTTTAAATGTTTCGAAGTAGCGCCATTTGGTCATTTCT-TTGCC--TAGA--T-----TTTAT-TAACAAAAGAA-----TT 80  
gsa_miR-71a/2a -----CAGAA--ATTGG--AATTTTTCCTCGGTCATTTTAAATGGCACGAAAACCTCTATGTAGTTTTCTTCAC-ATGGAT-GTAAGTT 77  
csi_miR-71a/2a/2b/2e -----CCGTGCCCGCGGC-GTACGGTTCA-CGGTTGTCCCAACGGTGCCTGCTGTACATTTCTGGG--T-ATGCT-TGTTCCGTTTTAT-----TTT 83  
sja_miR-71a/2a/2b/2e -----CAAC-ATAGCATTCA-TA--TGTTCTGGTCAGTTTTTC-TTCTATATTTGGTAAGTCCT-TTGACTATATGTCGTATCAT-----ACG 76  
sma_miR-71a/2a/2b/2e -----CGACCAAAATCATGAA-C--TGCCCTGAACTTTTTTC-TTATTCATCTGGTAAGCACT-TTGTTTTACTGTCCACACTGT-----TCA 76  
egr_miR-71a/2c/2b -----GTATTGCGGTGCGGTC--TTGGTGTCTGCTT-ATCTCACGCTTTTTCTTT-CATGTTTT-ATGCGTTTATA-CGCTTCAT-----GTT 78  
emu_miR-71a/2c/2b -----GTATTGCGGTGCGGTC--TTGGTGTCTGCTT-ATCTCACGCTTTTTCTTT-CATGTTTT-ATGCGTTTATA-CGCTTCAT-----GTT 78  
tso_miR-71a/2c/2b -----ATTGTGGGGTGGTC--TTGGTGTCTGCTT-ATCTCACGCTTTTTCTTT-CGCTGCTTTCATGCTTTTTATG-CGCCTGAT-----GTT 78  
hmi_miR-71a/2c/2b -----ATGTTTTTCT-CAGTCAC-TTCGTGCGATCTTGACTTCTCCCTTATTCTTTTGCTT-TTACTTGTTTTTGTA-AGTCTCGC-----TTT 81
```

miRNA name  
sec. struc.

```
71a/71c (sme)  
* .((((((((((..((((((((..((((((..(((--((-----(.)))))))))..))))))..))))))..)))- 171  
sme_miR-71c/2c TAGAAAGTTTGTGTTGTA-GTTTTCT-TGAAAGACATGGGTAGTGAG-ATTAATTTAAATTAATTAATTTAAAACTCATTATTCAAGTTTTTTCTTATAAG- 171  
sme_miR-71a-1/2a-1_l1 TA--ATTCAATTTTAAATGCATGAA-TGAAAGACACGGGTAGTGAG-AT-----AAGCTATATATC--ATCTCATTGCCAATGTCTTT---TAAA- 158  
sme_miR-71a-1/2a-1_l2 TA--ATTCAATTTTAAATGCATGAA-TGAAAGACACGGGTAGTGAG-AT-----AAGCTATATATC--ATCTCATTGCCAATGTCTTT---TAAA- 158  
sme_miR-71a2/2a2 TA--TTTTTTCTTGGG--TATAAC-TGAAAGACACGGGTAGTGAG-AT-----ATGGATTTTTTCT-ATCTCTATATTCTGTCTTT---CATA- 157  
gsa_miR-71a/2a CTC-TGTTATTCTGATACGCTTGA--TGAAAGACATGGGTAATGAGTATC-----ATCTAAGT-----TCTCATTATTCCGTGCTTT---CATAA 156  
csi_miR-71a/2a/2b/2e T-----TATGGTATCCGCGCTGTGAAAGACGATGGTAGTGAG-AT-----GATGAGTTT---GCATCTCCCTACCC-CGTCTTTTCC-GGCC- 159  
sja_miR-71a/2a/2b/2e CGA--AAAGATGTGATACTAGTGTCTGTGAAAGACGATGGTAGTGAG-AT-----GCCAG--TT---GCATCTCGCTTCCC-CGCCTTTCCC-GGTA- 157  
sma_miR-71a/2a/2b/2e TGT--GAAGATGTGATACTAGTGTCTGTGAAAGACGATGGTAGTGAG-AT-----GCCAG--TT---GCATCTCGCTTCCC-CGCCTTTCCC-GGTA- 157  
egr_miR-71a/2c/2b CGC--GCC--TTTGGCAGTCATCTCGTGAAGACGATGGTAGTGAG-AT-----ACAGAGGAATCGAGCATCTTGCTACTC-CGTCTTTTCCTAAGA- 164  
emu_miR-71a/2c/2b CGC--GCC--TTTGGCAGTCATCTCGTGAAGACGATGGTAGTGAG-AT-----ACAGAGGAATCGAGCATCTTGCTACTC-CGTCTTTTCCTAAGA- 164  
tso_miR-71a/2c/2b CCT--GTG--TTTGGCAGTCATCTCATGAAAGACGATGGTAGTGAG-AT-----ACAGAGGAATCGAGCATCTTGCTACTC-CGTCTTTTCCTAAGG- 164  
hmi_miR-71a/2c/2b ACC--GTA--AGCAGTTATCTGTGAAAGACGATGGTAGTGAG-AT-----ACAGAGGTTT--GCTCTTGCTACAC-CGTCTTTTCCTAAGA- 161
```

miRNA name  
sec. struc.

```
2a/2b (gsa) /2c (cestodes)  
--)))))..... .-((((((((..-----(((..((((((((((((((((((--((..(((..-----..)))))..)))))..)))))..)))- 244  
sme_miR-71c/2c --C-TACTATTTA--TCG-TCATTAATTTCTTTTTCAAAATACA-----AAAATCATCAATTTGGTCTGTTATAA--ATGGCT-----TT-----TAT 244  
sme_miR-71a-1/2a-1_l1 --CGTGTATTATTA--ACGATCGTAATATCAGTT-CATTTATG-----TGAGTT-CCAGTGTGCTATGATGATAT--ATTTCTAAAAATTT-CTATATAT 242  
sme_miR-71a-1/2a-1_l2 --CGTGTATTATTA--ACGATCGTAATATCAGTT-CATTTATG-----TGAGTT-CCAGTGTGCTATGATGATAT--ATTTCTAAAAATTT-CTATATAT 243  
sme_miR-71a2/2a2 --T--TTATTCACGATGGTCATCATAAATGTT-CACTTAAT-----TGAGTT-CTACGGTGTGTGATATA--ATGATTA--TTT-----ATAT 231  
gsa_miR-71a/2a TCGTTTTATTG-----TG--CGTCAGA-CGTGTT-CAATGATGAACCTAAGTTGCAAGCG--GTTGTTATATAATTTTATTTTTA--ATTC--AATATAT 242  
csi_miR-71a/2a/2b/2e --TGGACCATGAG-----TCATCATTTCCG-ATCTTTTACA-----CCGAGTCAATTTGGTTG-TAGGC-----ATGCA-----ACT-----T-TGT 229  
sja_miR-71a/2a/2b/2e --AGAATCACTAG--TCGTCAGTAAT--ACCTTTTGA-----CCGAGTCAATTTGGCTG-ATGGC-----ATTGTT-----TTA-----T-TGT 226  
sma_miR-71a/2a/2b/2e --AGAATCACGAG--TCGTCAGTAAT--ACCTTTTGA-----CCGAGTCAATTTGGCTG-AAGGC-----ATTGCT-----TTA-----T-TGT 226  
egr_miR-71a/2c/2b --TGCTGCTTTGA-----CCATCCCAGATTACGGGCGTTGT-----TCGTCGTCAACATTTGCCG-TAGAC-----ACGGGT-----TGC-----GATCT 235  
emu_miR-71a/2c/2b --TGCTGCTTTGA-----CCATCCCAGATTACGGGCGTTGT-----TCGTCGTCAACATTTGCCG-TAGAC-----ACGGGT-----TGC-----GATCT 235  
tso_miR-71a/2c/2b --TGCTGCTTTGA-----CCGTCCTGACTGTGGGCGTTGT-----TCGTCGTCAACATTTGCCG-TAGAC-----ATGGGT-----TGA-----TATCT 235  
hmi_miR-71a/2c/2b --TGCTGCATTAA-----TCGTCGGAATATAGGCTTTGT-----TCGTCGTCAACATTTGCTG-TATAC-----ATTGTT-----TCT-----TATCT 232
```



miRNA name  
sec. struc.

```
sme_miR-71c/2c      GAAATTTTAAATTGAT-----TTGATAAATGTAAATATGGATTATTGCCAAAAATATTTTAAATGAAATGTATTGAGA-----CCTTGAATGA-TATT 565
sme_miR-71a-1/2a-1_l1 GAAATAT--AATAGTT-----TTAG--AATTTCAGAATGTGTTATG---AAAGACTCCTAAAAATG----TATATTAACG-----CACGGAGTTACTGTT 574
sme_miR-71a-1/2a-1_l2 GAAATAT--AATAGTT-----TTAG--AATTTCAGAATGTGTTATG---AAAGACTCCTAAAAATG----TATATTAACG-----CACGGAGTTACTGTT 575
sme_miR-71a2/2a2    GGATTTT--AAGAG-----TGAGAAAAGTTATATATATATTGTT-----TATTAATTACATGCTTCTGC-TTAA-----TTTAAAGTCAAAGTT 570
gsa_miR-71a/2a      AAAACAT--GATTCAA-----TTATTAA---TGGACATATGCTAAC-CAATCATGAACATAAAATCA--TGATCTCATTG-----GTTCAA-TATATTTTCT 560
csi_miR-71a/2a/2b/2e GGGATGATCGCCAGTCCG---GTTAGGCCCT-----TGGTGCCTGCTGTGGCG---TTCGCGCCGCCAGCCCACGGTTG-GCCTCCTCGTGTAAAC--- 537
sja_miR-71a/2a/2b/2e GGGTTGATCGACAGCTGC--TGTTCAAGTAATGAG-TCATATATTGATGTTACT---TTTACCTCTCAACCAACAGCGTGATGTTTTTCTA-ATTGACTGT 544
sma_miR-71a/2a/2b/2e GGGTTGATCGACAGCTGG--TTTTG-GTA-TATT-TGATA-GTTTTTGTCCAAAAGTTTCTTTCTTCATT----CTTTA-GTCTTTTCA-GCGAACT-T 540
egr_miR-71a/2c/2b   AGGTTTTTGTCTGTGA--ACGCTGGGCATTGTT-TGGTCTGGGTTCAGTGCAGGCTCTCTT-----ACTTGT--TTG--GCCTCCAGGTTGGGCGC 544
emu_miR-71a/2c/2b   AGGTTTTTGTCTGTGA--ACGCTGGGCATTGTT-TGGTCTGGGTTCAGTGCAGGCTCTCTT-----ACTTGT--TTG--GCCTCCAGGTTGGGCGC 543
tso_miR-71a/2c/2b  ---TTTTTGTCTCACA--GTACTGTGCCCTG--TAGTGTAAATTCCTGAGTGTGATCTCCGT-----TTCTGTGGTCG--GACGCTGTGGTTTGTGC 537
hmi_miR-71a/2c/2b   GAATCATTTCCTTGAAATTCACCTATCCGATACTATGGCTTTTTACCTAAGTATGGGTGTGATGAAGTGA-TTTGTGATTC-----CTTAA-TGTTAATTTA 539
```

\*

miRNA name  
sec. struc.

```
sme_miR-71c/2c      ---CAAGATTTA-----ATTTTTATTG-----T-TAATAGGC-----GATAACA----- 600
sme_miR-71a-1/2a-1_l1 ---TA---TTG-----ATTCGTATT-----TAA-----GATTGCATA----- 600
sme_miR-71a-1/2a-1_l2 ---TA---TTG-----ATTCGTATT-----TAA-----GATTGCAT----- 600
sme_miR-71a2/2a2    TCAGCAGCATACAT-----ATTATCATT-----TAG-----GATA----- 600
gsa_miR-71a/2a      CCCATAAAAAATCA-----TCAACATCC-----AATAGT-----AATATCATTTTTT----- 600
csi_miR-71a/2a/2b/2e --CCGAGTCAAGGCAGATATTAGTG-CTTC-----CGCATGCT-GGTTGC-----GCGACCCGTTTTTTGCCGCTA 600
sja_miR-71a/2a/2b/2e TACGTTATGAAATGC-GAATTTTGTAAACGTT-----CAT-TGTT-TGCTTC-----GTATTCTTCAGTT----- 600
sma_miR-71a/2a/2b/2e TCCTCTGCCAATGCAGAACTACATCGTCTC-----AGT-CATT-GGC-----GAAATGGTGAGTTGATCGC-- 600
egr_miR-71a/2c/2b   CGCTGTGGGTTCGC-----CTGGGTGGCGTC-----GTCGCTCGTTCGCGCTCTCGGCGTGCGA--AT----- 600
emu_miR-71a/2c/2b   TCGTGTGGGTTCGC-----CTGGGTGGCGTC-----GTCGCTCGTTCAGCTTC--GCTGTGTCA--ATGCT----- 600
tso_miR-71a/2c/2b   CGCCGTGTAGGCGG-----TGGCTTGCCTTTGGGTTGTCTGTTCCGCTGG-CGGTGGGCGGTCATCCGT----- 600
hmi_miR-71a/2c/2b   CACGTTTTTTTTTGC-----TT---TATCTTT---GT-GATTATTAT-CCGGAGGGGGGGAGGGAATTCGGGGCT- 600
```

\*
