# Supplementary material for: Identification of microRNA Genes in Three Opisthorchiids
Source: PubMed Central journal article supplement (PMC4405270; doi:10.1371/journal.pntd.0003680), 2015-04-21
Supplement: pntd.0003680.s002.pdf [file pntd.0003680.s002.pdf]

**S2 Appendix.** Position of primers target regions in clusters.

csi – *C. sinensis*. Secondary structure of miRNA precursors is indicated by a parentheses and dots. Mature miRNA sequences including miR-2f are in bold type and underlined.

csi\_miR-71a/2a/2b/2e

>>>>>>>>>C11-F>>>>>>>>>

AAAGATATTTTCGCAAGTGATCAATGTTTTCCTCAGTCATTTTATTTGTCCGTGCCGCGGCGGTACGGTTCACGGTTGTCCACGCGTGCCTGCTGTACATTTTCGTGGTATGTCTTGTCCGTTTTATTTTTATGGTATCCGCGCTG 150  
.....  
.....>>>>clust1-for1>>>>  
.....>>>>clust1-for2>>>>  
.....<<<<<<C11-R<<<<<<  
.....<<<<<<clust1-rev<<<<<<

csi\_miR-71b/2f/2d/2c

>>>>>>>>>clust2-for>>>>>>>>>

CGTGTGTGCGTGAAGACTTGAGTAGTGAGACGCTCATTTGCTCATGGATTGCGCGCCTCATACTGAGTCTTTCGTGATGTGCCGGTGTATGCGTCCAGTCCAATGCTTGATGTCCGGTATTGATTCTGGCTGAGATAGCGGCTG 150  
.....<<<<<<  
.....<<<<<<clust2-rev<<<<<<
