# Supplementary material for: Identification of microRNA Genes in Three Opisthorchiids
Source: PubMed Central journal article supplement (PMC4405270; doi:10.1371/journal.pntd.0003680), 2015-04-21
Supplement: pntd.0003680.s005.pdf [file pntd.0003680.s005.pdf]

**S5 Appendix.** Alignment of miRNA clusters like regions.

csi – *C. sinensis*, sma – *S. mansoni*, hmi – *H. microstoma*, egr – *E. granulosus*, emu – *E. multilocularis*, sec. struc. – secondary structure

Mature miRNA sequences are in bold type and underlined.

Cluster of *C. sinensis* was obtained from scaffold 198 (gi|353342189|dbj|BADR02000773.1) (- strand)

Cluster of *S. mansoni* was obtained from chromosome W (gi|360043576|emb|HE601631.1) (- strand)

Cluster of *H. microstoma* was obtained from contig 880003 (gi|528308588|emb|CBLW010003541.1) (- strand)

Cluster of *E. granulosus* was obtained from contig 00137 (gi|528306514|emb|CBLN010001139.1) (+ strand)

Cluster of *E. multilocularis* was obtained from contig 007760 (gi|528775363|emb|CBLO010002096.1) (+ strand)

Cluster of *T. solium* was obtained from contig 00015 (pathogen\_TSM\_contig\_00015) (+ strand)
