# Supplementary material for: Identification of microRNA Genes in Three Opisthorchiids
Source: PubMed Central journal article supplement (PMC4405270; doi:10.1371/journal.pntd.0003680), 2015-04-21
Supplement: pntd.0003680.s006.pdf [file pntd.0003680.s006.pdf]

## S6 Appendix. Gene prediction in region between miR-1 and miR-133

### Gene prediction in region between miR-1 and miR-133 in *C. sinensis* genome

Length of sequence: 34008

Number of predicted genes 1: in +chain 1, in -chain 0.

Number of predicted exons 1: in +chain 1, in -chain 0.

Positions of predicted genes and exons: Variant 1 from 1, Score:7.841427

| G Str | Feature            | Start   | End   | Score | ORF     | Len       |
|-------|--------------------|---------|-------|-------|---------|-----------|
| 1 +   | TSS                | 33256   |       | -2.00 |         |           |
| 1 +   | 1 CDS <sub>o</sub> | 33380 - | 33631 | 9.10  | 33380 - | 33631 252 |
| 1 +   | PolA               | 33679   |       | 1.26  |         |           |

Predicted protein(s):

>FGENESH:[mRNA] 1 1 exon (s) 33380 - 33631 252 bp, chain +

```
ATGCGTGCAGTTCACCTTCCAGCGAAACGTCTGAAACAAGATCAACGCAGAGAGATTCCG
GTACATGGAATTTTGCATGCAGCTCAGAATCCCCATCTGAAACCGTATTATCCGGTGTA
GTTAGAAAACCGGGGACCGCGGGCAGAACATCCGGCGGTCGACTGAAGAAAGCGCCAGTT
GAACAAGGTGCAGATAAACGGTATTTGTTCAACTTACACAAGTATGCACAGGTATACTCA
ATAATATATTAG
```

>FGENESH: 1 1 exon (s) 33380 - 33631 83 aa, chain +

```
MRAVHFPAKRLKQDQRREIPVHGILRCSSPSETVLSGVVRKPGTAGRTSGGRLKKAPV
EQGADKRYLFNLHKYAQVYSIIY
```

### Gene prediction in region between miR-1 and miR-133 in *S. mansoni* genome

Length of sequence: 25498

Number of predicted genes 2: in +chain 1, in -chain 1.

Number of predicted exons 8: in +chain 2, in -chain 6.

Positions of predicted genes and exons: Variant 1 from 1, Score:37.246964

| G Str | Feature | Start | End | Score | ORF | Len |
|-------|---------|-------|-----|-------|-----|-----|
|-------|---------|-------|-----|-------|-----|-----|

|     |        |         |       |       |         |       |    |  |
|-----|--------|---------|-------|-------|---------|-------|----|--|
| 1 + | TSS    | 514     |       | -1.92 |         |       |    |  |
| 1 + | 1 CDSf | 1309 -  | 1354  | 3.36  | 1309 -  | 1353  | 45 |  |
| 1 + | 2 CDSi | 6721 -  | 6740  | -5.03 | 6723 -  | 6740  | 18 |  |
| 1 + | PolA   | 6857    |       | 1.88  |         |       |    |  |
| 2 - | PolA   | 7756    |       | 1.88  |         |       |    |  |
| 2 - | 1 CDSi | 8114 -  | 8185  | 0.10  | 8114 -  | 8185  | 72 |  |
| 2 - | 2 CDSi | 12428 - | 12464 | -4.20 | 12428 - | 12463 | 36 |  |
| 2 - | 3 CDSi | 17148 - | 17205 | -0.43 | 17150 - | 17203 | 54 |  |
| 2 - | 4 CDSi | 20437 - | 20483 | -6.57 | 20438 - | 20482 | 45 |  |
| 2 - | 5 CDSi | 23596 - | 23619 | 3.37  | 23598 - | 23618 | 21 |  |
| 2 - | 6 CDSf | 24831 - | 24847 | -0.73 | 24833 - | 24847 | 15 |  |
| 2 - | TSS    | 25130   |       | -4.81 |         |       |    |  |

Predicted protein(s):

>FGENESH:[mRNA] 1 2 exon (s) 1309 - 6740 66 bp, chain +

ATGTTTACCATATTTGAAGATAATTCACAGCAGCCTAAGCAAACCTATTGGTGGAGAAGAT  
TTATAG

>FGENESH: 1 2 exon (s) 1309 - 6740 21 aa, chain +

MFTIFEDNSQQPKQTIGGEDL

>FGENESH:[mRNA] 2 6 exon (s) 8114 - 24847 255 bp, chain -

ATGCAAGTTATTGAACAAATATTATTATGCTTAGCCTACAATTTTCAAAATAGTTTAACA  
AATTCATATTTTAGTTCATACTACTTTAAAACAAAACAACTAATAAAAAGAATAAGTTT  
ATTTTAAAAAAGTGTATTACTAACAAGTTTAATAATTTTAAACGTGTGCAAACCTCAAGTG  
CAGTGTGCATTACTTAAAGAGTTAAAAATAAATGAATTATCTAAAATCATGTTTAAATTC  
ATAGTCAATAGTTGA

>FGENESH: 2 6 exon (s) 8114 - 24847 84 aa, chain -

MQVIEQILLCLAYNFQNSLTNSYFSSYYFKTKQTNKKNKFKILKCCITNKFNNFKRVQTQV  
QCALLKELKINELSKIMFKFIVNS

**Gene prediction in region between miR-1 and miR-133 in *H. microstoma* genome**

Length of sequence: 15123

Number of predicted genes 3: in +chain 1, in -chain 2.

Number of predicted exons 6: in +chain 2, in -chain 4.

Positions of predicted genes and exons: Variant 1 from 1, Score:21.828844

| G Str | Feature | Start   | End   | Score | ORF     | Len      |
|-------|---------|---------|-------|-------|---------|----------|
| 1 -   | PolA    | 60      |       | 2.62  |         |          |
| 1 -   | 1 CDSl  | 90 -    | 120   | -8.41 | 90 -    | 119 30   |
| 1 -   | 2 CDSf  | 4016 -  | 4125  | 1.52  | 4018 -  | 4125 108 |
| 1 -   | TSS     | 4290    |       | 1.49  |         |          |
| 2 +   | TSS     | 5110    |       | -5.80 |         |          |
| 2 +   | 1 CDSf  | 5271 -  | 5372  | 8.35  | 5271 -  | 5372 102 |
| 2 +   | 2 CDSl  | 7571 -  | 7735  | -3.63 | 7571 -  | 7735 165 |
| 2 +   | PolA    | 7739    |       | 2.62  |         |          |
| 3 -   | PolA    | 9165    |       | 0.42  |         |          |
| 3 -   | 1 CDSl  | 9201 -  | 9314  | -2.19 | 9201 -  | 9314 114 |
| 3 -   | 2 CDSf  | 12154 - | 12159 | 2.27  | 12154 - | 12159 6  |
| 3 -   | TSS     | 13000   |       | 0.09  |         |          |

Predicted protein(s):

>FGENESH:[mRNA] 1 2 exon(s) 90 - 4125 141 bp, chain -

ATGAGCATACTTATCTTCGCTCTTGTAACCAACATCTACCTCTATTTCTATTCCTTGC  
TCTAGAAATAAAGTTTCAGCAAACGCTCTCAAAAATATCGTGAATTGAGGTATGGCAGT  
TTAAAACAGCATGAGGTTTAA

>FGENESH: 1 2 exon(s) 90 - 4125 46 aa, chain -

MSILIFALVNQHLPLFLFTCSRNVSAKRSQKYRELRYGSLKQHEV

>FGENESH:[mRNA] 2 2 exon(s) 5271 - 7735 267 bp, chain +

ATGGTTGGCCAAGCACATCACGGAATAGGCGTAGAATCCATAACCTCGGACTTAGCAATT  
GCCTATTGGCAAGACTTATTAACGAGGTATGGAGACAAACGCAATTTATGCGTTCCTGC  
GATTTGCTGCCTACATTTTGCCAAATTGAACCGCTTCCCAATCTACATCCCCCTTTACA  
CTTGCAGGGAAAGCAAATACCGCTCCGCGAAAATGTCTAATTAAGACGATTAAGACAA  
ACTACTGATAAACTTAATCCCATTTGA

>FGENESH: 2 2 exon (s) 5271 - 7735 88 aa, chain +  
MVGQAHHGIGVESITSDLAIAYWQDLLNEVWRQTQFMRSCDLLPTFCQIEPLPNLHPPLT  
LAGKANTAPRKCLIKRRLRQTDDKLNPI  
>FGENESH:[mRNA] 3 2 exon (s) 9201 - 12159 120 bp, chain -  
ATGGAGGGTATAATTTTGAGGAAAAATGCACACATATTGAATTGTGCAGGTGTAAAGTTA  
ATTGAGGCGATTGCAAATTGTATAGTTCATGAAGTGTTTCCTTATTCAAAGCACCCCTGA  
>FGENESH: 3 2 exon (s) 9201 - 12159 39 aa, chain -  
MEGIILRKNAILNCAGVKLIEAIANCIVHEVFPYSKHP

### Gene prediction in region between miR-1 and miR-133 in *E. granulosus* genome

Length of sequence: 11833

Number of predicted genes 1: in +chain 1, in -chain 0.

Number of predicted exons 4: in +chain 4, in -chain 0.

Positions of predicted genes and exons: Variant 1 from 1, Score:1.270266

| G Str | Feature | Start   | End   | Score | ORF     | Len      |
|-------|---------|---------|-------|-------|---------|----------|
| 1 +   | 1 CDSf  | 820 -   | 973   | 4.61  | 820 -   | 972 153  |
| 1 +   | 2 CDSi  | 4041 -  | 4197  | 3.52  | 4043 -  | 4195 153 |
| 1 +   | 3 CDSi  | 7100 -  | 7259  | 0.01  | 7101 -  | 7259 159 |
| 1 +   | 4 CDSi  | 11650 - | 11727 | 4.14  | 11650 - | 11727 78 |

Predicted protein(s):

>FGENESH:[mRNA] 1 4 exon (s) 820 - 11727 549 bp, chain +  
ATGGGAGCGGACGGGGAAGAAGCTAACAGTGCAATAGCTCCTTCAATGCACGTTCTCATG  
CACGATCAAGCACTGAACGGCGACAGTGTAACACTACAGCCTTTGCAACCCATTCGCAGCGA  
AGAGGGGAGCGAGATGAAAGTGAAGTGGGAGGAGGGTTAAAGACTGCGAGCGTAGCTTTG  
GAGAGGGCGAAACCTCAAACGTGGATTAATGGAAGCTCCTCAAAGCGTAGCATAGCTAGA  
ATAAAGTCAGAATTTAATGGAACGATAAAAAATGGAAATAAACACCTGCTTATTAACCAA  
AATCTTCCACATATTACTACAACCAACGGCGTTCTATCTCGAATAGTTGGATACGCTGGT  
GAAAGACACCGCTATGATCTCCTTTCCCAATATTTTTGTCTAAGAGGTACATTCATTTG  
CACACTAGTGAGGACCGTATGCTATTTTTACTGTTGGCTTTTTACCAAAGGGGTCAATT  
CGTAATGCACCGTGGAAGAGATCTTCTATCTGTACGATGGAGGAAAGGGATGAAGGAAAG

TGGATTCT

>FGENESH: 1 4 exon (s) 820 - 11727 183 aa, chain +  
MGADGEELNSAIAPSMHVLMDQALNGDSVTTAFATHSQRRGERDESEVGGGLKTASVAL  
ERAKPQTWINGSSSKRSIARIKSEFNNGTIKNGNKHLLINQNLPHITTTNGVLSRIVGYAG  
ERHRYDLLSQYFLSKRYIHLHTSEDRMLFLLAFYQKGSIRNAPWKRSSICTMEERDEGK  
WIS

### Gene prediction in region between miR-1 and miR-133 in *E. multilocularis* genome

Length of sequence: 11705  
no reliable predictions

### Gene prediction in region between miR-1 and miR-133 in *T. solium* genome

Length of sequence: 11660  
Number of predicted genes 2: in +chain 2, in -chain 0.  
Number of predicted exons 2: in +chain 2, in -chain 0.  
Positions of predicted genes and exons: Variant 1 from 1, Score:8.071529

| G Str | Feature            | Start  | End  | Score | ORF    | Len      |
|-------|--------------------|--------|------|-------|--------|----------|
| 1 +   | TSS                | 1497   |      | -4.80 |        |          |
| 1 +   | 1 CDS <sub>o</sub> | 1546 - | 1815 | 8.39  | 1546 - | 1815 270 |
| 1 +   | PolA               | 2062   |      | 1.26  |        |          |
| 2 +   | TSS                | 6789   |      | -0.90 |        |          |
| 2 +   | 1 CDS <sub>o</sub> | 6948 - | 7271 | 6.54  | 6948 - | 7271 324 |
| 2 +   | PolA               | 8092   |      | 1.26  |        |          |

Predicted protein(s):

>FGENESH:[mRNA] 1 1 exon (s) 1546 - 1815 270 bp, chain +  
ATGAGTACCCAAATTATCAAGGGAATAAGGCGTTTGACTAGACACACGCAAACAGTGAGG  
AGGAATTGGGGTCAGATGGCTGCGCTACATAACGCTACATCTCCGTTTTGCGGAAAACCTC  
GTCGATGGTGATCCGAAAAGAAGTTACAAAATGAAAGAAAACCTTCGGCTGGGCTTCAACT  
AGAACAAAATCCACTGAGGCATACAGAGTAGAGAGAAATAAAAAGGGTGAACCGGTCGTC

TGTACAGCGTGTGTAATCAACGTCGTGTGA

>FGENESH: 1 1 exon (s) 1546 - 1815 89 aa, chain +

MSTQIIKGIRRLTRHTQTVRRNWGQMAALHNATSPFCGKLVGDGPKRSYKMKENFGWAST  
RTKSTEAYRVERNKKGEPVVCTACVINVV

>FGENESH:[mRNA] 2 1 exon (s) 6948 - 7271 324 bp, chain +

ATGAAGCTTATTACAGAGCTTAAAGTGCCTCCGAGCAGGATGGGATTAACATCCACGAGT  
AGCGTTAATAAGGCCTTTGACTTAATGAGCTGTCACATTTACATCGACTCGCAGGTGGC  
ATCACGTTTATTTGCTGGGGCAATACGTACATTGTCAAATGCTTCATTTATTGGAAGTG  
TTACCACAACAAGAGGCATTCCATCTCGATCAATCGGGTACGCTGGTGAATTGCAACGAT  
GCGATCCCATTTGCAATACCTTCTGTCTAAGGAGTACATTTATTTGCACACAAATGAGA  
ACCGTATGCTATTTTACGATTAG

>FGENESH: 2 1 exon (s) 6948 - 7271 107 aa, chain +

MKLITELKVPPSRMGLTSTSSVNKAFDLMSCHISHRLAGGITFICWGNTYIVKMLHLLEV  
LPQQEAFHLDQSGTLVNCNDAIPFRNTFCLRSTFICTQMRTVCYFYD
