# Supplementary material for: Identification of microRNA Genes in Three Opisthorchiids
Source: PubMed Central journal article supplement (PMC4405270; doi:10.1371/journal.pntd.0003680), 2015-04-21

**S1 Figure.** Original photo of electrophoretograms.

Original photo of electrophoretogram of PCR products for Fig. 4D and Fig. 7E

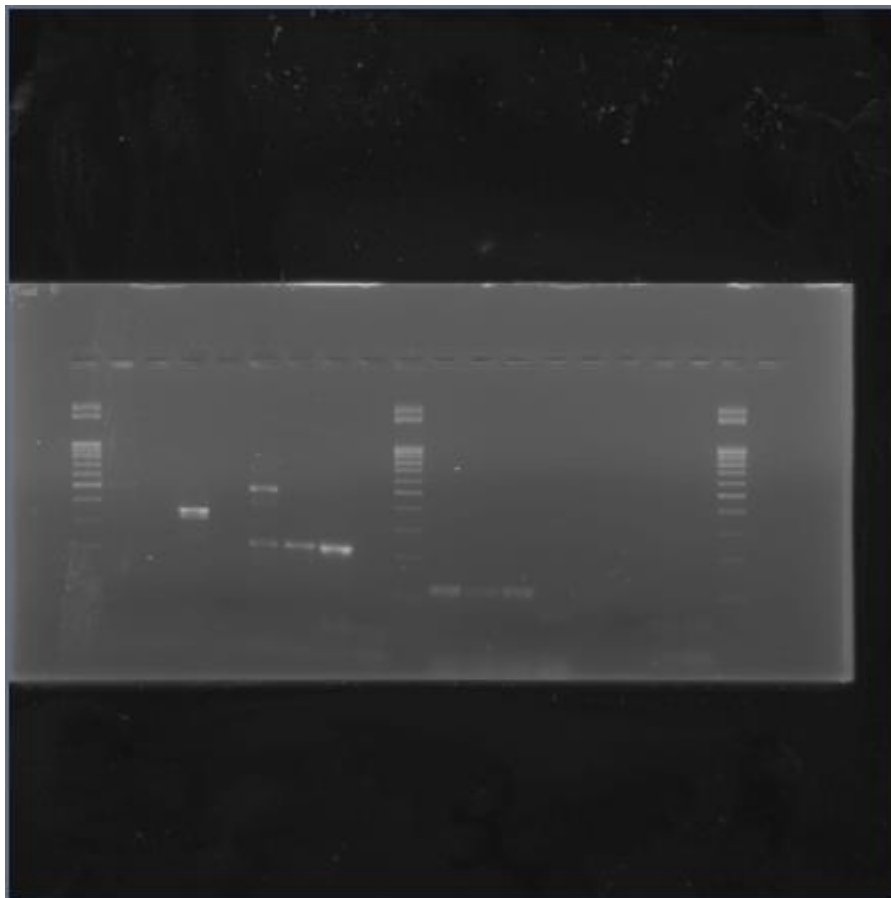

Original photo of electrophoretogram of PCR products for Fig. 4F

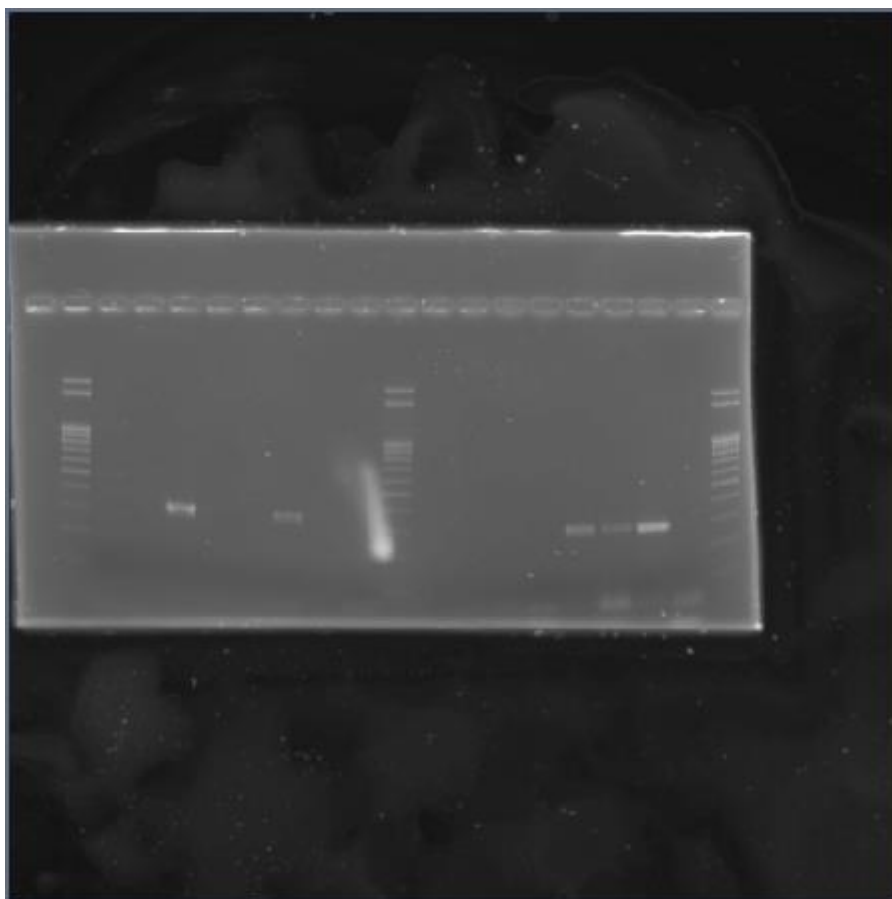

Original photo of electrophoretogram of PCR products for Fig. 4G

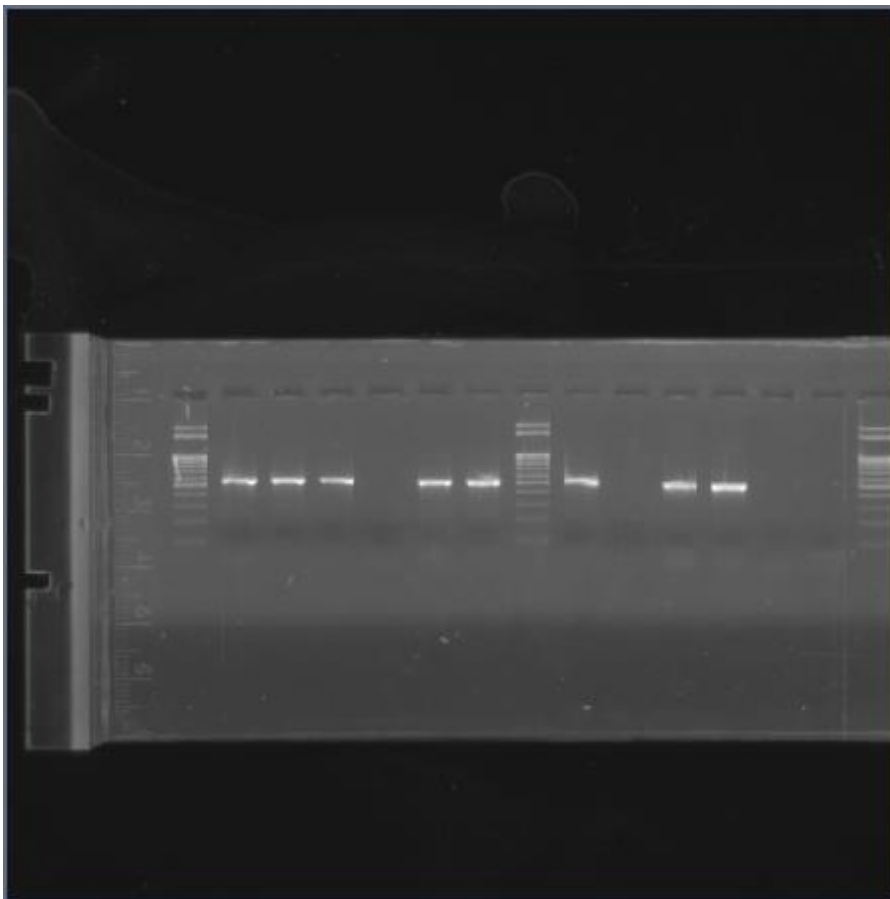

Supplement: pntd.0003680.s010.pdf [file pntd.0003680.s010.pdf]
