# Supplementary material for: Identification of microRNA Genes in Three Opisthorchiids
Source: PLoS Negl Trop Dis. 2015 Apr 21;9(4):e0003680. doi: 10.1371/journal.pntd.0003680 (PMC4405270; doi:10.1371/journal.pntd.0003680)
Supplement: S3 Appendix — sec. struc.—secondary structure. Mature miRNA sequences are in bold type and underlined. (PDF) [file pntd.0003680.s003.pdf]

sec. struc. – secondary structure. Mature miRNA sequences are in bold type and underlined.

|            |        |
|------------|--------|
| miRNA name | miR-2a |
|------------|--------|

[illegible]

| miRNA name          |                                                                  | <u>miR-2b</u> |
|---------------------|------------------------------------------------------------------|---------------|
| sec. struc.         | ...(((((((.....--))))).)))))..)                                  |               |
| <i>C. sinensis</i>  | CGCGTCCCAAAGGACTGTGAGGCAGTGCCGT--CCTGTATCACAGCCCTGCTTTGGGACAC    | 118           |
| <i>O. felineus</i>  | CGCGTCCCAGGGGACTGTGAGGCAGTGCCAT--CCTGTATCACAGCCCTGCTTTGGGACAC    | 118           |
| <i>O. viverrini</i> | CGCGTCCCAGGGGACTGTGAGGCAGTGCCAT--CCTGTATCACAGCCCTGCTTTGGGACAC    | 118           |
| <i>S. japonicum</i> | CGCGTCTCAAAGGACTGTGAGCCAACGTAATTACT-GTATCACAGCCCTGCTTTGGGACAC    | 116           |
| <i>S. mansoni</i>   | CGCGTCTCAAGGGGACTGTGAAGCATCTGTAACCA-TTTGTATCACAGCCCTGCTTTGGGACAC | 117           |
|                     | *****                                                            | *****         |

| miRNA name          | sec. struc.                 | ...                                 | 178 |
|---------------------|-----------------------------|-------------------------------------|-----|
| <i>C. sinensis</i>  | AGGCCACCTAATTAAAGCGTCGAAACC | TCCCACCGTTCCTTACCAACTTTGACTGCGTTATA | 178 |
| <i>O. felinus</i>   | AGGCCACCTAATTAAATCGTCGAAACC | TCCCACCGTTCCTTACCAACTTTGACTGCGTTATA | 178 |
| <i>O. viverrini</i> | AGGCCACCTAATTAAAGCGTCGAAACC | TCCCACCGTTCCTTACCAACTTTGACTGCGTTATA | 178 |
| <i>S. japonicum</i> | AGCCTACCTGCTTAGTCATCTACTGT  | TCCCACCGCTCTTACCAACTTAGACTGAGTTATA  | 176 |
| <i>S. mansoni</i>   | AGCCTACCTGCTAAGACATCTCTTTG  | TCCCACCGCTCTTACCAACTTTGACTGAGTTATA  | 177 |

| miRNA name          | miR-2e                             |       |       |       |      |       |       |        |        |     |  |  |  |  |  |  |  |  |  |  |
|---------------------|------------------------------------|-------|-------|-------|------|-------|-------|--------|--------|-----|--|--|--|--|--|--|--|--|--|--|
| sec. struc.         | (.(.....)---).)))))...)))))..))))) |       |       |       |      |       |       |        |        |     |  |  |  |  |  |  |  |  |  |  |
| <i>C. sinensis</i>  | CTGTTCCATTG                        | ---   | CTGTG | TATC  | CAGT | CCAAG | C     | TTTGGT | 215    |     |  |  |  |  |  |  |  |  |  |  |
| <i>O. felineus</i>  | CTGTTCCATTG                        | ---   | CTGTG | TATC  | CAGT | CCAAG | C     | TTTGGT | 215    |     |  |  |  |  |  |  |  |  |  |  |
| <i>O. viverrini</i> | CTGTTCCATTG                        | ---   | CTGTG | TATC  | CAGT | CCAAG | C     | TTTGGT | 215    |     |  |  |  |  |  |  |  |  |  |  |
| <i>S. japonicum</i> | CTGCT                              | ACTGT | AAGCT | TTTGT | TATC | CAGT  | CCAAG | C      | TTTGGT | 217 |  |  |  |  |  |  |  |  |  |  |
| <i>S. mansoni</i>   | CTGCTTTTGT                         | AAGCC | TTTGT | TATC  | CAGT | CCAAG | C     | TTTGGT | 218    |     |  |  |  |  |  |  |  |  |  |  |
|                     | *** *                              | *     | ***   | ***** |      |       |       |        |        |     |  |  |  |  |  |  |  |  |  |  |

Mature miRNA sequences including miR-2f are in bold type and underlined

[illegible]
