# Supplementary material for: Identification of microRNA Genes in Three Opisthorchiids
Source: PLoS Negl Trop Dis. 2015 Apr 21;9(4):e0003680. doi: 10.1371/journal.pntd.0003680 (PMC4405270; doi:10.1371/journal.pntd.0003680)
Supplement: S4 Appendix — sec. struc.—secondary structure. Mature miRNA sequences are in bold type and underlined. (PDF) [file pntd.0003680.s004.pdf]

sec. struc. – secondary structure. Mature miRNA sequences are in bold type and underlined.

[illegible]

| miRNA name          |                                                                | <u>miR-2a</u> |
|---------------------|----------------------------------------------------------------|---------------|
| sec. struc.         | ((...((...( ((((((((((((((.( (((((((.....))))))))) ))))))).... |               |
| <i>C. sinensis</i>  | TCACACCGCAGTCAATATTGGTTGTAGGCAATGCAACTTTGTCACAGCCAGTATTGATGA   | 177           |
| <i>O. felineus</i>  | TCACACCGCAATCAATATTGGTTGTAGGCAATGCAACTTTGTCACAGCCAGTATTGATGA   | 177           |
| <i>O. viverrini</i> | TCACACCGCAGTCAATATTGGTTGTAGGCAGTGCAATTTTGTCACAGCCAGTATTGATGA   | 177           |
| <i>S. japonicum</i> | TTGCCCGCAGTCAATATTGGCTGATGGCATTGTTTTATTGTCACAGCCAGTATTGATGA    | 174           |
| <i>S. mansoni</i>   | TTGCCCGCAGTCAATATTGGCTGAAGGCATTGCTTTATTGTCACAGCCAGTATTGATGA    | 174           |
|                     | * * **** * ***** ** * * *                                      | *****         |

| miRNA name          | sec. struc.  | Sequence                                                     | Position |
|---------------------|--------------|--------------------------------------------------------------|----------|
| <i>C. sinensis</i>  | .)))...))))) | ACGGGGCGAAGGACGCACGTCCACCCTGCGTTAGGTGGTGCGCGTCCCAAAGGACTGTG  | 237      |
| <i>O. felinus</i>   | .)))...))))) | ACGGGGCGAAGGACGCACGTCCACCCTGCGTTAGGTGGTGCGCGTCCCAAAGGACTGTG  | 237      |
| <i>O. viverrini</i> | .)))...))))) | ACGGGGCGAAGGACGCACGTCCACCCTGCGTTAGGTGGTGCGCGTCCCAAAGGACTGTG  | 237      |
| <i>S. japonicum</i> | .)))...))))) | ACGGGGGTAAATAGGCGCACGTCCACCCTGCGTTAGGTGGTGCGCGTCCAAAGGACTGTG | 231      |
| <i>S. mansoni</i>   | .)))...))))) | ACGGGTCTAAAGGCGCACGTCCACCCTGCGTTAGGTGGTGCGCGTCCAAAGGACTGTG   | 231      |

| miRNA name          |                                                    | <u>miR-2b</u>   |       |
|---------------------|----------------------------------------------------|-----------------|-------|
| sec. struc.         | (.(((.....--.)))..)))))..))))).))....)))))))))     |                 |       |
| <i>C. sinensis</i>  | AGGCAGTGCCGT--CCTGTAATCAACAGCCCTGCTTTGGGACACAGGCCA | CCTAAATTAAGCGT  | 295   |
| <i>O. felineus</i>  | AGGCAGTGCCAT--CCTGTAATCAACAGCCCTGCTTTGGGACACAGGCCA | CCTAAATTAATCGT  | 295   |
| <i>O. viverrini</i> | AGGCAGTGCCAT--CCTGTAATCAACAGCCCTGCTTTGGGACACAGGCCA | CCTAAATTAAGCGT  | 295   |
| <i>S. japonicum</i> | AGCCAACGCTAATTACT-GTAATCAACAGCCCTGCTTTGGGACACAGCC  | TACCTGCTTAGTCAT | 290   |
| <i>S. mansoni</i>   | AACAATCTGTAAACCATTTGTAATCAACAGCCCTGCTTTGGGACACAGCC | TACCTGCTTAAGCAT | 291   |
|                     | * * *                                              | *****           | * * * |

| miRNA name          | sec. struc.                                          | Sequence                                                      | Position |
|---------------------|------------------------------------------------------|---------------------------------------------------------------|----------|
| <i>C. sinensis</i>  | .....(((.(((((((((((.(((((.(((.(((.(((.....)----).)) | CGAAACCTCCCACCGTTCTTACCAACTTTGACTGCGTTATACTGTTCCATTG----CTGT  | 351      |
| <i>O. felineus</i>  |                                                      | CGAAACCTCCCACCGTTCTTACCAACTTTGACTGCGTTATACTGTTCCATTG----CTGT  | 351      |
| <i>O. viverrini</i> |                                                      | CGAAACCTCCCACCGTTCTTACCAACTTTGACTGCGTTATACTGTTCCATTG----CTGT  | 351      |
| <i>S. japonicum</i> |                                                      | CATAGTGTCCCACCGTCTCTTACCAACTTAGACTGAGTTATACTGCTCTGTGAAGCTTTGT | 350      |
| <i>S. mansoni</i>   |                                                      | CTCTTTGTCCTTACCTTACCAACTTTGACTGAGTTATACTGCTTTGTGAAGCCTTTGT    | 351      |

```

miRNA name      miR-2e
sec. struc.     )))...)))).))..)))))...))..
C. sinensis    GTATCAGTCCAAGCTTTGGTAAGTTTGGGTGGGATGATCGCC 395
O. felinus    GTATCAGTCCAAGCTTTGGTAAGTTTGGGTGGGATGATCGCC 395
O. viverrini  GTATCAGTCCAAGCTTTGGTAAGTTTGGGTGGGATGATCGCC 395
S. japonicum  ATATCAGTCCAAGCTTTGGTAAGTTTTGTGGGTTGATCGAC 394
S. mansoni   ATATCAGTCCAAGCTTTGGTAAGTTTTGTGGGTTGATCGAC 395

```
